# Supplementary material
Source: Springer Nature journal article supplement (https://www.springermedizin.de/resource/supplementary/12885_2010_2579_MOESM4_ESM.pdf/9462612)

## Cytokeratin

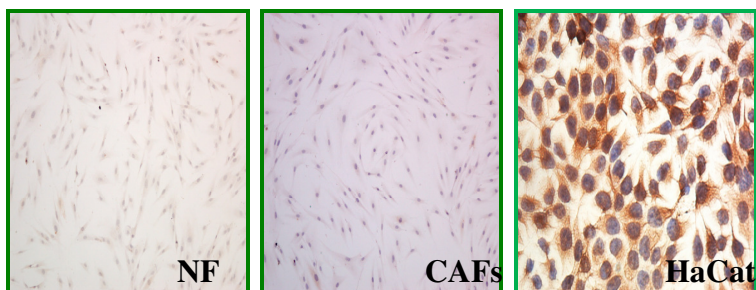

## Vimentin

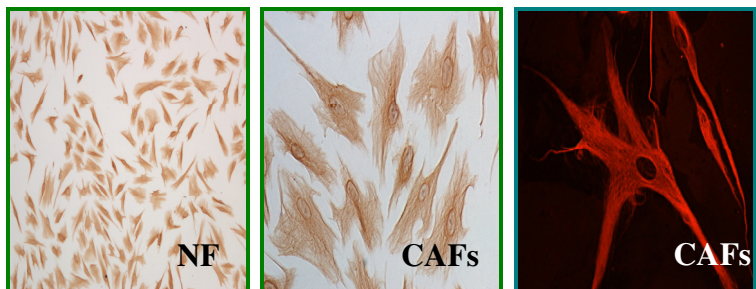

## $\alpha$ -SMA

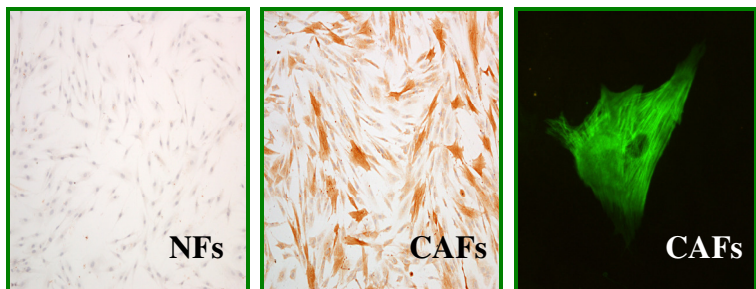

Supplement: MOESM4 [file 9462612]
